# Supplementary material for: Upregulation of SERPINE2 Results in Poor Prognosis of Hepatoblastoma via Promoting Invasion Abilities
Source: Hindawi journal article supplement (doi:10.1155/2022/2283541), 2022-12-02

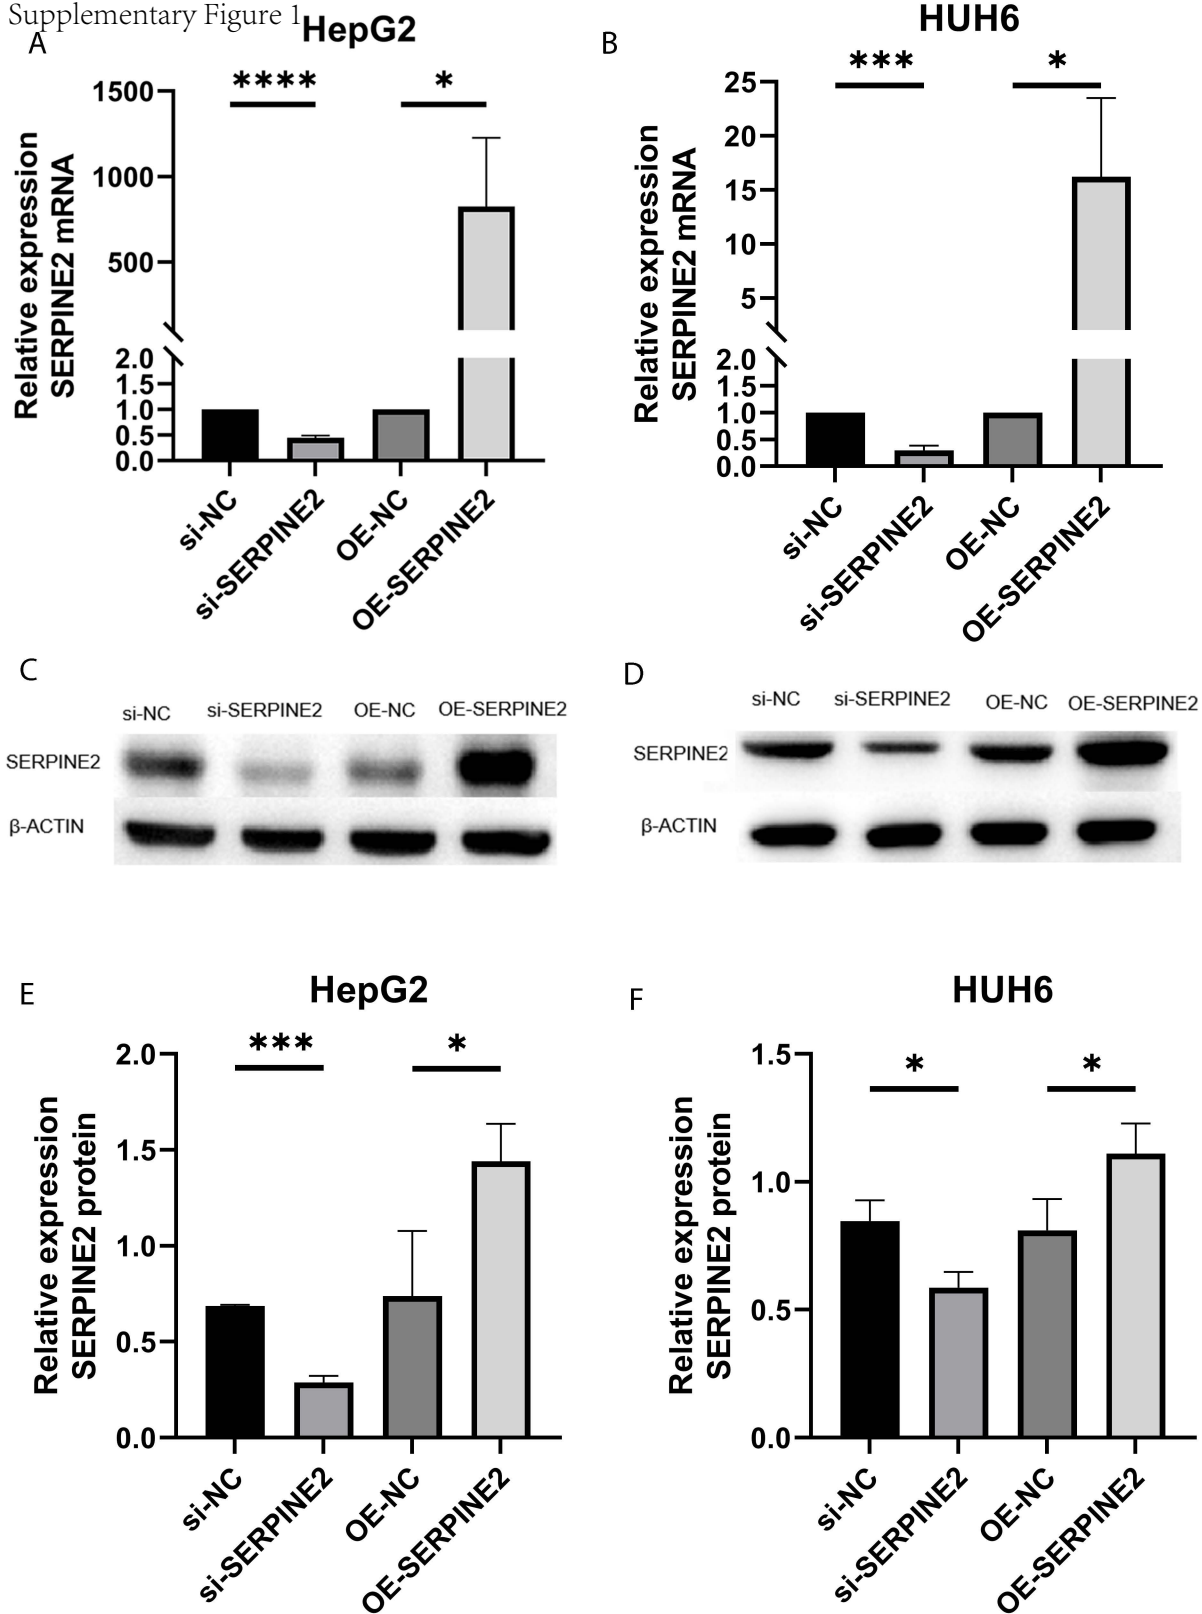

Supplement: f1 [file 2283541.f1.pdf]
